# Supplementary material
Source: PubMed Central journal article supplement (PMC7116838)
Supplement: EMS114917-supplement-Supplementary_Table_1.pdf [file EMS114917-supplement-Supplementary_Table_1.pdf]

Supplementary Table 1: Average cluster expression levels of genes used in Fig1.c heatmap

| Gene                 | ETP    | ILC2p  | NKp   | $\gamma\delta$ Tcell | Gene                 | ETP   | ILC2p | NKp    | $\gamma\delta$ Tcell |
|----------------------|--------|--------|-------|----------------------|----------------------|-------|-------|--------|----------------------|
| <i>Bex6</i>          | 1.874  | 0.012  | 0.004 | 0.054                | <i>Cd8b1</i>         | 0.020 | 0.311 | 0.021  | 8.721                |
| <i>Mpo</i>           | 2.068  | 0.014  | 0.005 | 0.054                | <i>Dntt</i>          | 0.006 | 0.015 | 0.005  | 1.579                |
| <i>Adgrg1</i>        | 4.254  | 0.052  | 0.038 | 0.108                | <i>Cd8a</i>          | 0.014 | 0.234 | 0.019  | 4.863                |
| <i>Lyl1</i>          | 1.851  | 0.015  | 0.029 | 0.036                | <i>Endou</i>         | 0.070 | 0.162 | 0.006  | 4.127                |
| <i>Cd34</i>          | 1.771  | 0.020  | 0.013 | 0.000                | <i>Blk</i>           | 0.057 | 0.361 | 0.012  | 4.648                |
| <i>Angpt1</i>        | 1.755  | 0.024  | 0.005 | 0.090                | <i>lqch</i>          | 0.002 | 0.061 | 0.000  | 1.436                |
| <i>Hbb-bt</i>        | 9.021  | 0.066  | 0.047 | 0.144                | <i>Chrma9</i>        | 0.011 | 0.024 | 0.005  | 1.328                |
| <i>Spi1</i>          | 1.818  | 0.012  | 0.070 | 0.018                | <i>Cd4</i>           | 0.007 | 0.016 | 0.012  | 1.005                |
| <i>Plac8</i>         | 29.731 | 0.894  | 0.201 | 9.188                | <i>Etv5</i>          | 0.044 | 0.093 | 0.021  | 1.759                |
| <i>Mef2c</i>         | 1.741  | 0.017  | 0.051 | 0.018                | <i>Cd247</i>         | 0.100 | 0.972 | 0.432  | 8.380                |
| <i>Mzb1</i>          | 2.970  | 0.091  | 0.011 | 1.830                | <i>Sh2d1a</i>        | 0.054 | 0.488 | 0.034  | 4.558                |
| <i>Pdgfrb</i>        | 1.058  | 0.033  | 0.009 | 0.179                | <i>Cd3d</i>          | 0.382 | 2.489 | 1.607  | 23.992               |
| <i>Bcl11a</i>        | 1.930  | 0.047  | 0.136 | 0.036                | <i>Izumo1r</i>       | 0.021 | 0.062 | 0.001  | 1.131                |
| <i>Pde4d</i>         | 1.537  | 0.087  | 0.018 | 0.269                | <i>Lef1</i>          | 0.119 | 0.738 | 0.092  | 6.263                |
| <i>Sell</i>          | 1.894  | 0.117  | 0.006 | 1.579                | <i>Arl5c</i>         | 0.039 | 0.433 | 0.074  | 3.661                |
| <i>Plekha7</i>       | 1.096  | 0.035  | 0.098 | 0.108                | <i>Rag1</i>          | 0.110 | 0.072 | 0.016  | 3.571                |
| <i>Myb</i>           | 4.341  | 0.319  | 0.086 | 4.199                | <i>Sox13</i>         | 0.206 | 0.239 | 0.004  | 2.728                |
| <i>Alox5ap</i>       | 2.175  | 0.192  | 0.081 | 0.036                | <i>Cd6</i>           | 0.064 | 0.091 | 0.002  | 1.148                |
| <i>BC035044</i>      | 2.164  | 0.129  | 0.173 | 0.879                | <i>Tubb2b</i>        | 0.225 | 0.397 | 0.030  | 4.414                |
| <i>Zeb2</i>          | 1.230  | 0.109  | 0.025 | 0.036                | <i>Themis</i>        | 0.130 | 0.167 | 0.038  | 2.135                |
| <i>Tmem121</i>       | 2.176  | 0.162  | 0.065 | 2.315                | <i>Nsg2</i>          | 0.039 | 0.097 | 0.027  | 1.005                |
| <i>Nme4</i>          | 2.539  | 0.325  | 0.049 | 0.538                | <i>Cd28</i>          | 0.032 | 0.118 | 0.234  | 1.597                |
| <i>Egfl7</i>         | 1.430  | 0.135  | 0.096 | 0.108                | <i>5830411N06Rik</i> | 0.015 | 0.361 | 0.245  | 2.458                |
| <i>Dym</i>           | 1.691  | 0.161  | 0.128 | 0.179                | <i>Klrd1</i>         | 0.175 | 0.162 | 12.391 | 0.144                |
| <i>Ly6d</i>          | 1.238  | 0.043  | 0.005 | 0.700                | <i>Xcl1</i>          | 0.309 | 0.348 | 29.599 | 0.072                |
| <i>Il1r1</i>         | 0.039  | 2.961  | 0.047 | 0.090                | <i>Klrc1</i>         | 0.039 | 0.050 | 3.727  | 0.072                |
| <i>Pxdc1</i>         | 0.060  | 4.226  | 0.141 | 0.126                | <i>Itga1</i>         | 0.016 | 0.016 | 1.829  | 0.090                |
| <i>Stab2</i>         | 0.023  | 1.728  | 0.036 | 0.018                | <i>Ncr1</i>          | 0.020 | 0.030 | 2.489  | 0.036                |
| <i>Ccr6</i>          | 0.028  | 1.422  | 0.044 | 0.000                | <i>Klrc2</i>         | 0.025 | 0.030 | 2.163  | 0.036                |
| <i>Hlf</i>           | 0.054  | 1.856  | 0.032 | 0.197                | <i>Slamf7</i>        | 0.019 | 0.033 | 1.831  | 0.054                |
| <i>Icos</i>          | 0.146  | 8.522  | 0.877 | 0.808                | <i>Klra5</i>         | 0.018 | 0.020 | 2.562  | 0.018                |
| <i>Fam83a</i>        | 0.014  | 1.125  | 0.100 | 0.054                | <i>Klrb1c</i>        | 0.017 | 0.010 | 1.424  | 0.036                |
| <i>Ltb4r1</i>        | 0.125  | 2.440  | 0.071 | 0.036                | <i>Cxcr3</i>         | 0.031 | 0.076 | 2.407  | 0.072                |
| <i>Cysltr1</i>       | 0.186  | 3.726  | 0.196 | 0.197                | <i>Klrb1b</i>        | 0.030 | 0.146 | 3.219  | 0.072                |
| <i>Itgb3</i>         | 0.044  | 1.663  | 0.130 | 0.951                | <i>Klrk1</i>         | 0.093 | 0.582 | 9.774  | 0.090                |
| <i>Actn2</i>         | 0.037  | 1.230  | 0.065 | 0.287                | <i>Pdzk1</i>         | 0.033 | 0.014 | 1.614  | 0.018                |
| <i>Calca</i>         | 0.029  | 2.320  | 0.090 | 0.036                | <i>lfn3</i>          | 0.024 | 0.034 | 2.413  | 0.000                |
| <i>Nav2</i>          | 0.054  | 1.542  | 0.089 | 2.530                | <i>Pglyrp1</i>       | 0.104 | 0.210 | 5.454  | 0.126                |
| <i>Tnfrsf25</i>      | 0.059  | 2.251  | 0.525 | 1.705                | <i>Gzmc</i>          | 0.149 | 0.140 | 22.419 | 0.018                |
| <i>4932438H23Rik</i> | 0.021  | 0.634  | 0.018 | 1.202                | <i>Sulf2</i>         | 0.024 | 0.014 | 1.053  | 0.018                |
| <i>Mdfic</i>         | 0.063  | 1.549  | 0.331 | 0.395                | <i>Ccl5</i>          | 0.385 | 0.457 | 20.983 | 0.072                |
| <i>Ly6a</i>          | 0.614  | 10.349 | 2.010 | 0.538                | <i>Gas7</i>          | 0.014 | 0.031 | 1.013  | 0.000                |
| <i>Cish</i>          | 0.080  | 1.296  | 0.215 | 0.162                | <i>Dapk2</i>         | 0.047 | 0.023 | 1.339  | 0.000                |
| <i>Ccr9</i>          | 0.117  | 3.530  | 0.106 | 17.765               | <i>Klrb1f</i>        | 0.091 | 0.091 | 2.433  | 0.054                |
| <i>Rora</i>          | 0.070  | 2.634  | 0.826 | 1.812                | <i>Cx3cr1</i>        | 0.073 | 0.068 | 2.104  | 0.700                |
| <i>Il13</i>          | 0.039  | 2.160  | 0.629 | 0.000                | <i>Il2rb</i>         | 0.033 | 0.269 | 2.733  | 0.215                |
| <i>Myo6</i>          | 0.080  | 2.193  | 0.444 | 4.719                | <i>H2-Q6</i>         | 0.016 | 0.146 | 1.312  | 0.000                |
| <i>Rorc</i>          | 0.025  | 1.044  | 0.198 | 3.553                | <i>Ccl1</i>          | 0.056 | 0.036 | 1.905  | 0.031                |
| <i>Arg1</i>          | 0.019  | 1.810  | 0.723 | 0.072                | <i>Cd3e</i>          | 0.320 | 1.508 | 0.107  | 7.950                |
| <i>Id3</i>           | 0.040  | 1.193  | 0.211 | 5.814                | <i>Capn3</i>         | 0.159 | 0.110 | 0.059  | 1.741                |
